# Supplementary material for: Effect of Methyl Jasmonate and Methyl Jasmonate Plus Urea Foliar Applications on Wine Phenolic, Aromatic and Nitrogen Composition
Source: MDPI journal article supplement (doi:10.3390/beverages8030052), 2022-09-01
Supplement: s1 [file s1]

**Table S1.** Climatic conditions during all vegetative cycle of both vintages.

| Month     | 2019                |                     |      | 2020                |                     |      |
|-----------|---------------------|---------------------|------|---------------------|---------------------|------|
|           | Rainfalls<br>(l/m2) | Temperature<br>(°C) |      | Rainfalls<br>(l/m2) | Temperature<br>(°C) |      |
|           |                     | Max*                | Min* |                     | Max*                | Min* |
| April     | 63,2                | 23,9                | 0,3  | 61,4                | 21,5                | 12,7 |
| May       | 32,5                | 29,5                | 2,2  | 39,2                | 30,4                | 17,8 |
| June      | 45,9                | 40,9                | 6,5  | 47,1                | 33,3                | 18,4 |
| July      | 29,9                | 38,6                | 10,5 | 9,1                 | 36,9                | 22,2 |
| August    | 11,5                | 35,4                | 12,3 | 32,9                | 37,1                | 21,8 |
| September | 64,8                | 28,8                | 8,3  | 28,1                | 32,5                | 18,8 |
| October   | 30,1                | 28,8                | 5,3  | 30,7                | 23,2                | 12,9 |
| November  | 120                 | 22,4                | 0,7  | 31,3                | 21,9                | 9,9  |

\* Max: maximum, Min: minimum.
